# Supplementary material for: Detection of A-to-I RNA Editing in SARS-COV-2
Source: MDPI journal article supplement (doi:10.3390/genes13010041), 2021-12-23
Supplement: s1 [file s1]

| BioProject  | Run         | Source      | ReadType | ReadLen | TotalReads | FilteredRead | UniqueSars-<br>c | Virus load | ErrorRate | Depth      | Coverage   | StrandOrient | AC | AG   | AT | CA | CG | CT   | GA   | GC | GT | TA | TC   | TG | ALL   | A-to-I     | noA-to-I   | C-to-U     | noC-to-U   | Hyper-A-to-I | Hyper-NO-A-to-I | %Hyper      |
|-------------|-------------|-------------|----------|---------|------------|--------------|------------------|------------|-----------|------------|------------|--------------|----|------|----|----|----|------|------|----|----|----|------|----|-------|------------|------------|------------|------------|--------------|-----------------|-------------|
| PRJNA616446 | SRR11454606 | Throat swab | PAIRED   | 117,03  | 11336944   | 8464368      | 2892             | 0,03416676 | 0,002144  | 9,64160787 | 0,96455205 | unstranded   | 0  | 0    | 0  | 0  | 0  | 0    | 0    | 0  | 0  | 0  | 0    | 0  | 0     | 0          | 0          | 0          | 0          | 0            | 0               | 0           |
| PRJNA616446 | SRR11454607 | Faeces      | PAIRED   | 134,32  | 8614872    | 7524910      | 18324            | 0,24351122 | 0,0023    | 62,5317861 | 0,99692339 | unstranded   | 0  | 1    | 0  | 0  | 0  | 0    | 0    | 0  | 0  | 0  | 0    | 0  | 0     | 1          | 100        | 0          | 0          | 100          | 0               | 0           |
| PRJNA616446 | SRR11454608 | Throat swab | PAIRED   | 129,13  | 5380820    | 4816276      | 157470           | 3,26953854 | 0,00017   | 610,545932 | 0,99983279 | unstranded   | 0  | 7    | 1  | 0  | 0  | 0    | 7    | 1  | 0  | 0  | 0    | 5  | 0     | 21         | 57,1428571 | 42,8571429 | 38,0952381 | 61,9047619   | 0               | 0           |
| PRJNA616446 | SRR11454612 | Sputum      | PAIRED   | 150,81  | 7510502    | 4880934      | 4024             | 0,08244324 | 0,0003    | 13,7615289 | 0,96227803 | unstranded   | 0  | 0    | 0  | 0  | 0  | 0    | 0    | 0  | 0  | 0  | 0    | 0  | 0     | 0          | 0          | 0          | 0          | 0            | 0               | 0           |
| PRJNA616446 | SRR11454613 | BALF        | PAIRED   | 150,71  | 10837378   | 7759910      | 646234           | 8,32785432 | 0,000258  | 2256,34017 | 0,99956526 | unstranded   | 4  | 818  | 11 | 1  | 4  | 80   | 79   | 3  | 2  | 9  | 824  | 1  | 1836  | 89,4335512 | 10,5664488 | 8,66013072 | 91,3398693 | 4            | 0               | 100         |
| PRJNA616446 | SRR11454614 | BALF        | PAIRED   | 150,86  | 11517258   | 7344558      | 1350838          | 18,3923662 | 0,000266  | 4167,78203 | 0,99969903 | unstranded   | 13 | 2599 | 31 | 13 | 9  | 430  | 392  | 8  | 26 | 27 | 2714 | 8  | 6270  | 84,7368421 | 15,2631579 | 13,1100478 | 86,8899522 | 2            | 0               | 100         |
| PRJNA616446 | SRR11454615 | BALF        | PAIRED   | 150,56  | 10458618   | 7721418      | 93306            | 1,20840498 | 0,000304  | 321,725813 | 0,99889643 | unstranded   | 1  | 5    | 1  | 0  | 1  | 3    | 2    | 0  | 0  | 4  | 1    | 18 | 18    | 50         | 50         | 27,7777778 | 72,2222222 | 0            | 0               | 0           |
| PRJNA605907 | SRR11059940 | BALF        | PAIRED   | 150,62  | 5894       | 5386         | 5136             | 95,3583364 | 0,000388  | 21,0624686 | 0,9894325  | unstranded   | 0  | 0    | 0  | 0  | 0  | 0    | 0    | 1  | 0  | 0  | 0    | 1  | 0     | 1          | 0          | 100        | 0          | 100          | 0               | 0           |
| PRJNA605907 | SRR11059941 | BALF        | PAIRED   | 150,59  | 1324       | 544          | 356              | 65,4411765 | 0,000282  | 1,42453934 | 0,56281978 | unstranded   | 0  | 0    | 0  | 0  | 0  | 0    | 0    | 0  | 0  | 0  | 0    | 0  | 0     | 0          | 0          | 0          | 0          | 0            | 0               | 0           |
| PRJNA605907 | SRR11059942 | BALF        | PAIRED   | 150,73  | 138434     | 129026       | 120716           | 93,5594376 | 0,000434  | 478,335786 | 0,875464   | unstranded   | 0  | 127  | 0  | 1  | 4  | 9    | 11   | 0  | 2  | 3  | 129  | 0  | 286   | 89,5104895 | 10,4895105 | 6,99300699 | 93,006993  | 1            | 4               | 20          |
| PRJNA605907 | SRR11059943 | BALF        | PAIRED   | 150,69  | 15732      | 11784        | 10322            | 87,5933469 | 0,000466  | 39,3937398 | 0,34153764 | unstranded   | 0  | 0    | 1  | 1  | 0  | 0    | 1    | 0  | 1  | 1  | 0    | 0  | 5     | 0          | 100        | 20         | 80         | 3            | 0               | 100         |
| PRJNA605907 | SRR11059944 | BALF        | PAIRED   | 101     | 899308     | 798700       | 753452           | 94,334794  | 0,0003    | 1904,88941 | 0,99969903 | unstranded   | 2  | 1167 | 20 | 16 | 19 | 192  | 147  | 9  | 18 | 17 | 1168 | 4  | 2779  | 84,0230299 | 15,9769701 | 12,1986326 | 87,8013674 | 3            | 1               | 75          |
| PRJNA605907 | SRR11059945 | BALF        | PAIRED   | 101     | 151472     | 108824       | 107966           | 99,211571  | 0,000552  | 267,753804 | 0,86964519 | unstranded   | 0  | 0    | 0  | 0  | 0  | 0    | 0    | 0  | 0  | 0  | 0    | 0  | 0     | 0          | 0          | 0          | 0          | 0            | 0               | 0           |
| PRJNA605907 | SRR11059946 | BALF        | PAIRED   | 101     | 5163220    | 4690828      | 4646334          | 99,0514681 | 0,000514  | 5411,99629 | 0,99993312 | unstranded   | 24 | 5356 | 72 | 22 | 41 | 1109 | 1203 | 43 | 21 | 73 | 5485 | 12 | 13461 | 80,5363643 | 19,4636357 | 17,1755442 | 82,8244558 | 11           | 2               | 84,61538462 |
| PRJNA605907 | SRR11059947 | BALF        | PAIRED   | 101     | 55220536   | 53050982     | 49924022         | 94,1057453 | 0,000324  | 7674,38652 | 0,99093736 | unstranded   | 4  | 2693 | 19 | 16 | 33 | 817  | 782  | 15 | 29 | 28 | 3042 | 2  | 7480  | 76,671123  | 23,328877  | 21,3770053 | 78,6229947 | 59           | 14              | 80,82191781 |
| PRJNA601736 | SRR10903401 | BALF        | PAIRED   | 150,5   | 953264     | 800788       | 24946            | 3,11518155 | 0,000082  | 102,800087 | 0,99939805 | unstranded   | 0  | 0    | 0  | 0  | 0  | 1    | 1    | 0  | 0  | 0  | 0    | 0  | 2     | 0          | 100        | 100        | 0          | 0            | 1               | 0           |
| PRJNA601736 | SRR10903402 | BALF        | PAIRED   | 150,57  | 1353388    | 1120090      | 104712           | 9,34853449 | 0,000092  | 429,913989 | 0,99926429 | unstranded   | 0  | 5    | 0  | 0  | 1  | 4    | 0    | 0  | 0  | 1  | 2    | 0  | 13    | 53,8461538 | 46,1538462 | 30,7692308 | 69,2307692 | 0            | 9               | 0           |
