# Supplementary figures and images for: Detection of A-to-I RNA Editing in SARS-COV-2
Source: MDPI journal article supplement (doi:10.3390/genes13010041), 2021-12-23

# Calu-3 Total RNA

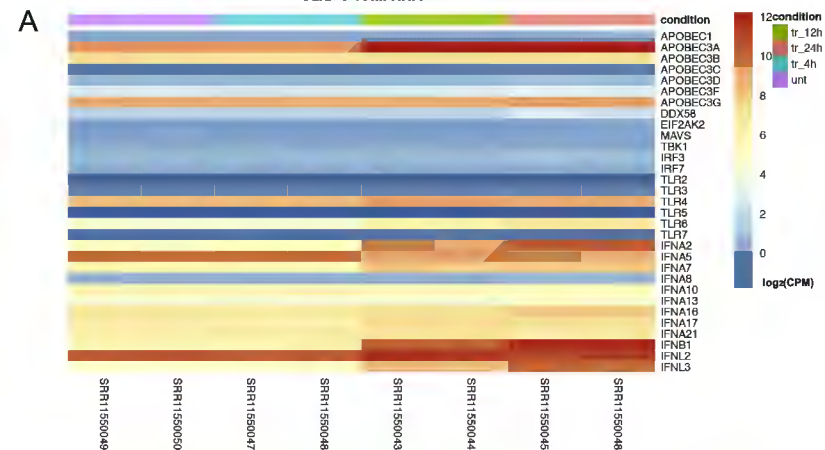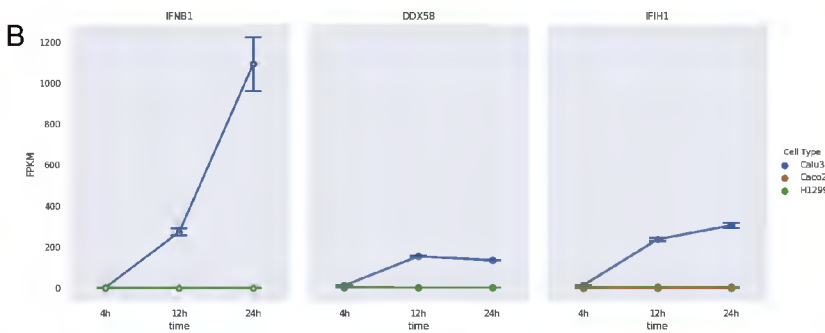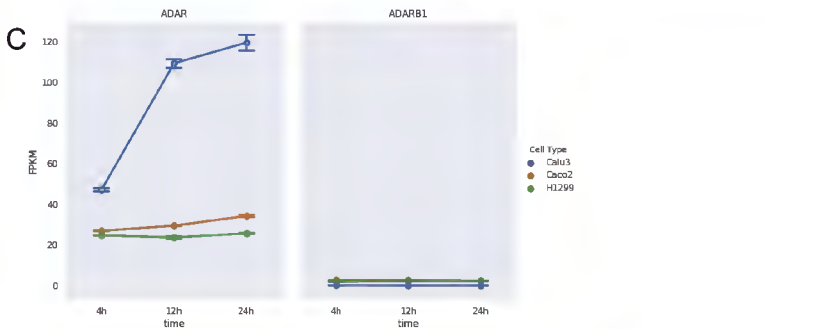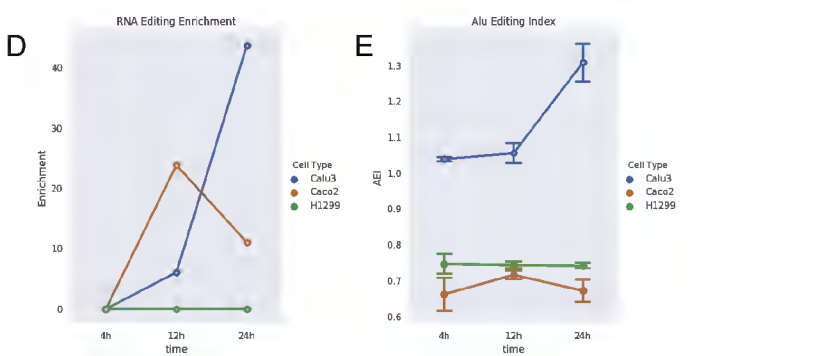

Supplement: s1 [file s1]

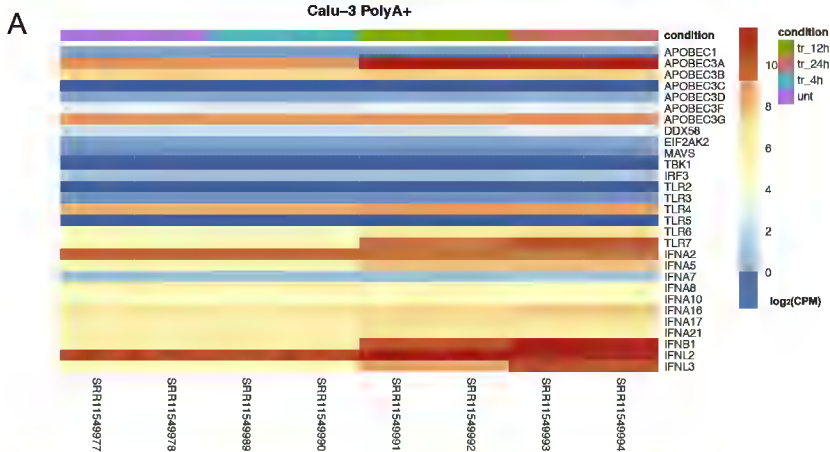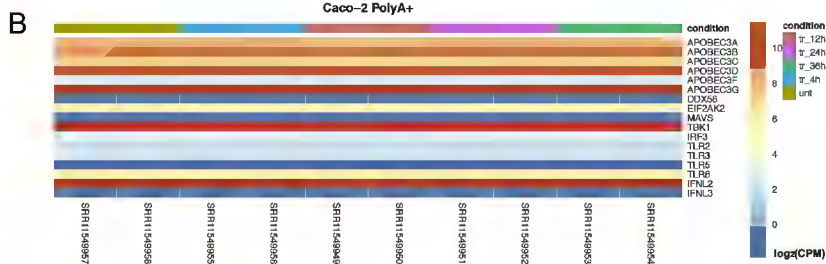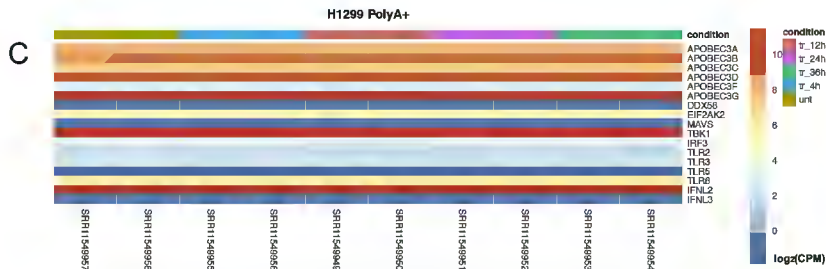

Supplement: s1 [file s1]
